# Supplementary material for: Oncogenic KRAS-Dependent Stromal Interleukin-33 Directs the Pancreatic Microenvironment to Promote Tumor Growth
Source: PubMed Central journal article supplement — Cancer Discov. 2024 Jul 3;14(10):1964–89. doi: 10.1158/2159-8290.CD-24-0100 (PMC11450371; doi:10.1158/2159-8290.cd-24-0100), 2024-07-03
Supplement: cd-24-0100_supplementary_figure_s2_suppsf2.pdf [file cd-24-0100_supplementary_figure_s2_suppsf2.pdf]

**Figure S2**

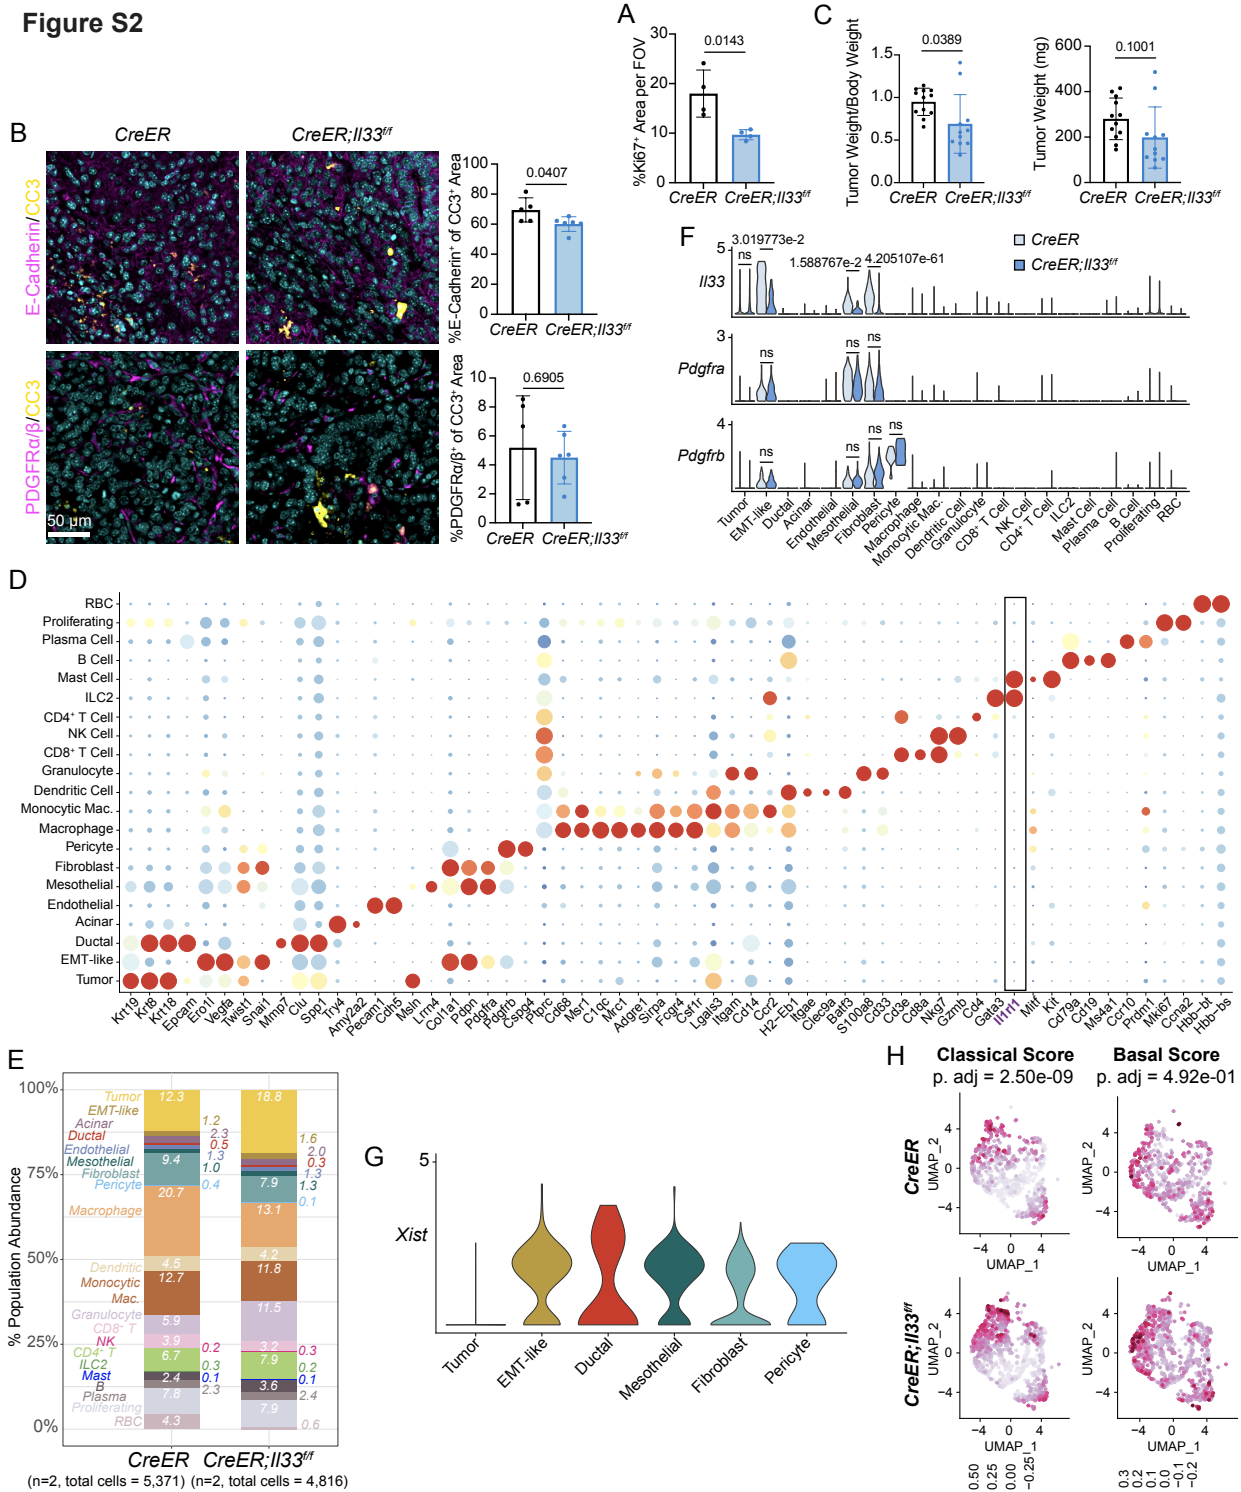

**Figure S2: Stromal IL-33 promotes PDA growth.** (A) Quantification of overall Ki67<sup>+</sup> area from **Figure 2E**. (B) Co-IF staining of CC3 (yellow) and PDGFR $\alpha/\beta$  or E-Cadherin (magenta), and DAPI (cyan). In quantification, colocalization was measured out of total CC3 staining; each dot represents one animal. (C) Relative and absolute tumor sizes from *CreER* and *CreER;Il33<sup>ff</sup>* scRNAseq orthotopic model. (D) Dot plot representation of population-defining marker genes across the merged *CreER* and *CreER;Il33<sup>ff</sup>* scRNAseq dataset. *Il1r1* (ST2) is highlighted. (E) Histogram depicting the frequency of each cell type across *CreER* and *CreER;Il33<sup>ff</sup>* scRNAseq dataset. (F) Violin plots depicting gene expression levels across cell types and split by *CreER* and *CreER;Il33<sup>ff</sup>*. Statistics are Wilcoxon rank sum tests with Bonferroni correction. Adjusted p values are displayed; values >0.05 are written as non-significant (ns). (G) Violin plot of *Xist* expression across cell types; both *CreER* and *CreER;Il33<sup>ff</sup>* animals are represented in the plot. (H) Feature plot of Classical and Basal signature scores within tumor cells split by *CreER* and *CreER;Il33<sup>ff</sup>* groups. Scores >0.00 indicate positive enrichment. Scores were compared between *CreER* and *CreER;Il33<sup>ff</sup>* tumor cells using Wilcoxon rank sum tests with Bonferroni correction. Histogram data are mean  $\pm$  standard deviation. Experiments with two conditions were compared using two-tailed Student's *t* test.
