# Supplementary material for: Oncogenic KRAS-Dependent Stromal Interleukin-33 Directs the Pancreatic Microenvironment to Promote Tumor Growth
Source: PubMed Central journal article supplement — Cancer Discov. 2024 Jul 3;14(10):1964–89. doi: 10.1158/2159-8290.CD-24-0100 (PMC11450371; doi:10.1158/2159-8290.cd-24-0100), 2024-07-03
Supplement: cd-24-0100_supplementary_figure_s4_suppsf4.pdf [file cd-24-0100_supplementary_figure_s4_suppsf4.pdf]

**Figure S4**

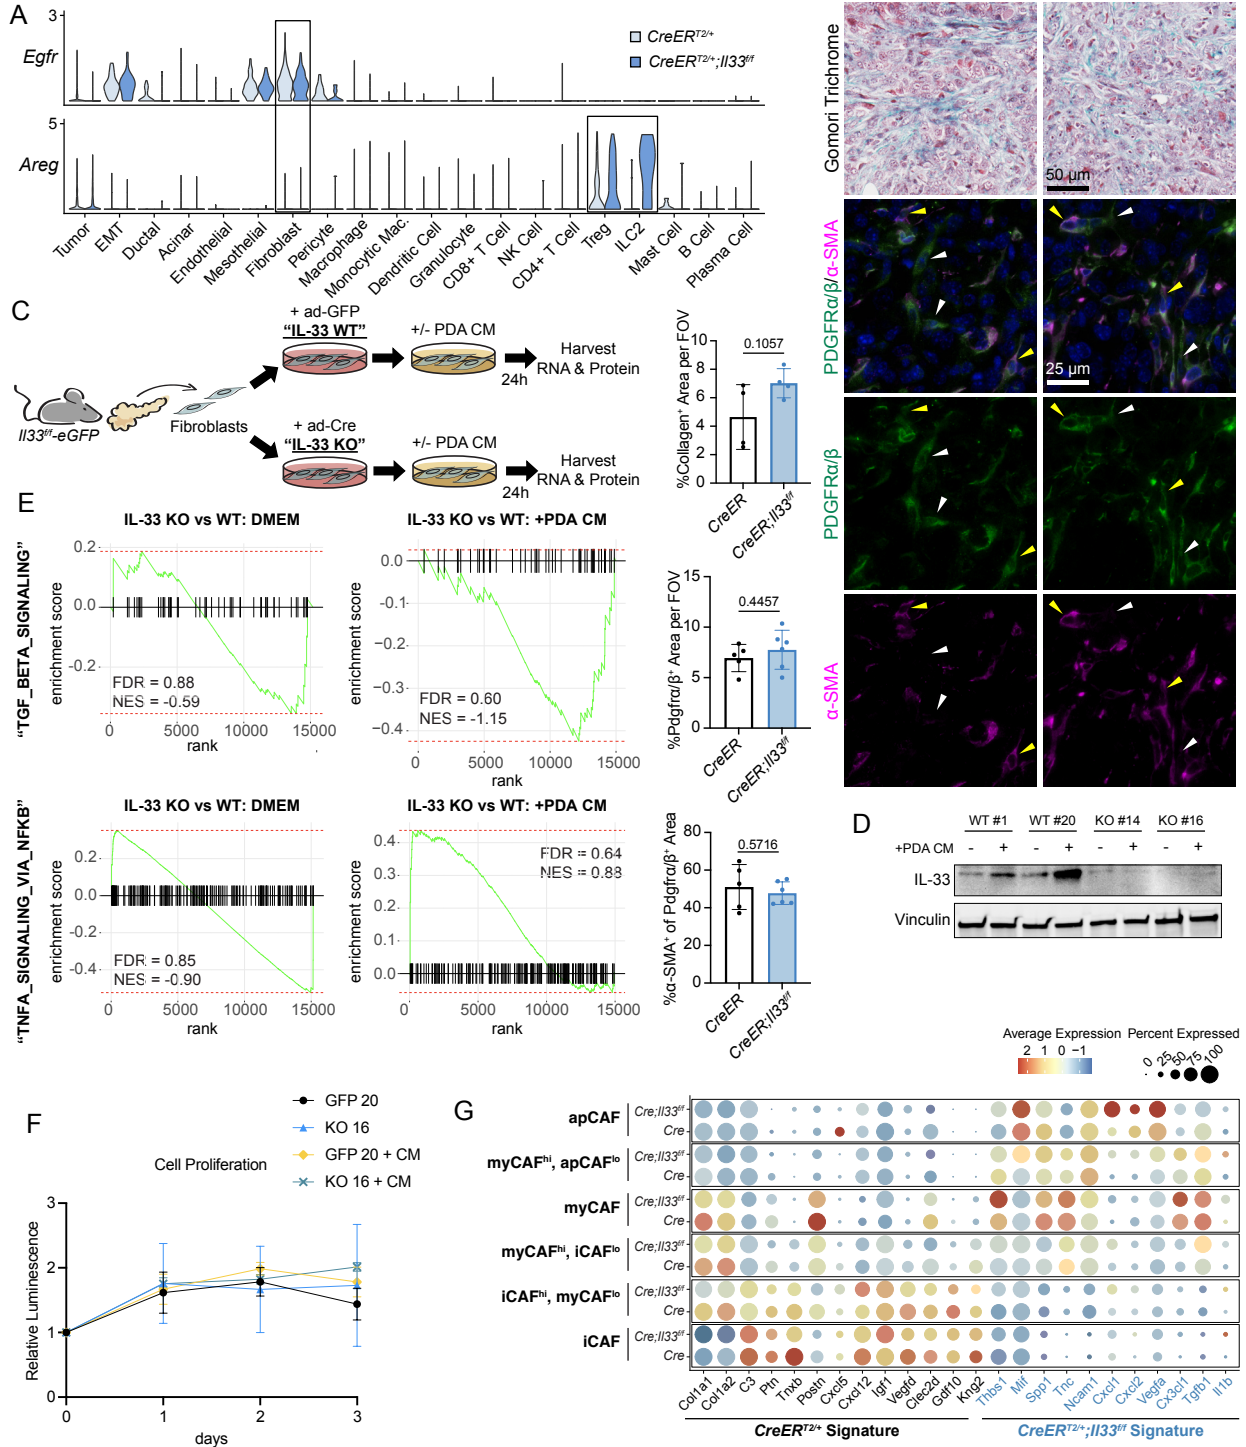

**Figure S4: Loss of stromal IL-33 alters the ST2<sup>+</sup> immune cell secretome, resulting in a shift in CAF differentiation.** (A) Expression of *Areg* and *Egfr* across cell types in the *CreER* and *CreER;Il33<sup>ff</sup>* scRNAseq datasets. (B) Immunostaining of *CreER* and *CreER;Il33<sup>ff</sup>* tumors. Top = Gomori trichrome staining, bottom = Co-IF staining of PDGFR $\alpha/\beta$  (green),  $\alpha$ -SMA (magenta), and DAPI (blue); arrows denote representative PDGFR $\alpha/\beta$ <sup>+</sup>  $\alpha$ -SMA<sup>+</sup> cells (yellow) or PDGFR $\alpha/\beta$ <sup>+</sup>  $\alpha$ -SMA<sup>-</sup> cells (white). (C) Diagram depicting generation and treatment of IL-33 WT and IL-33 KO fibroblast lines. (D) Protein expression from fibroblasts in (C). (E) GSEA enrichment plots from bulk RNAseq of fibroblasts from (C). (F) Proliferation of IL-33 WT and KO fibroblasts with and without PDA CM treatment. (G) Gene expression of differentially expressed ligands from **Figure 3H** grouped by CAF subtype and split by experimental group. For staining quantification, each dot represents one animal, and values were compared using two-tailed Student's *t* test. Histogram data are mean  $\pm$ standard deviation.
