# Supplementary material for: Oncogenic KRAS-Dependent Stromal Interleukin-33 Directs the Pancreatic Microenvironment to Promote Tumor Growth
Source: PubMed Central journal article supplement — Cancer Discov. 2024 Jul 3;14(10):1964–89. doi: 10.1158/2159-8290.CD-24-0100 (PMC11450371; doi:10.1158/2159-8290.cd-24-0100), 2024-07-03
Supplement: cd-24-0100_supplementary_figure_s7_suppsf7.pdf [file cd-24-0100_supplementary_figure_s7_suppsf7.pdf]

**Figure S7**

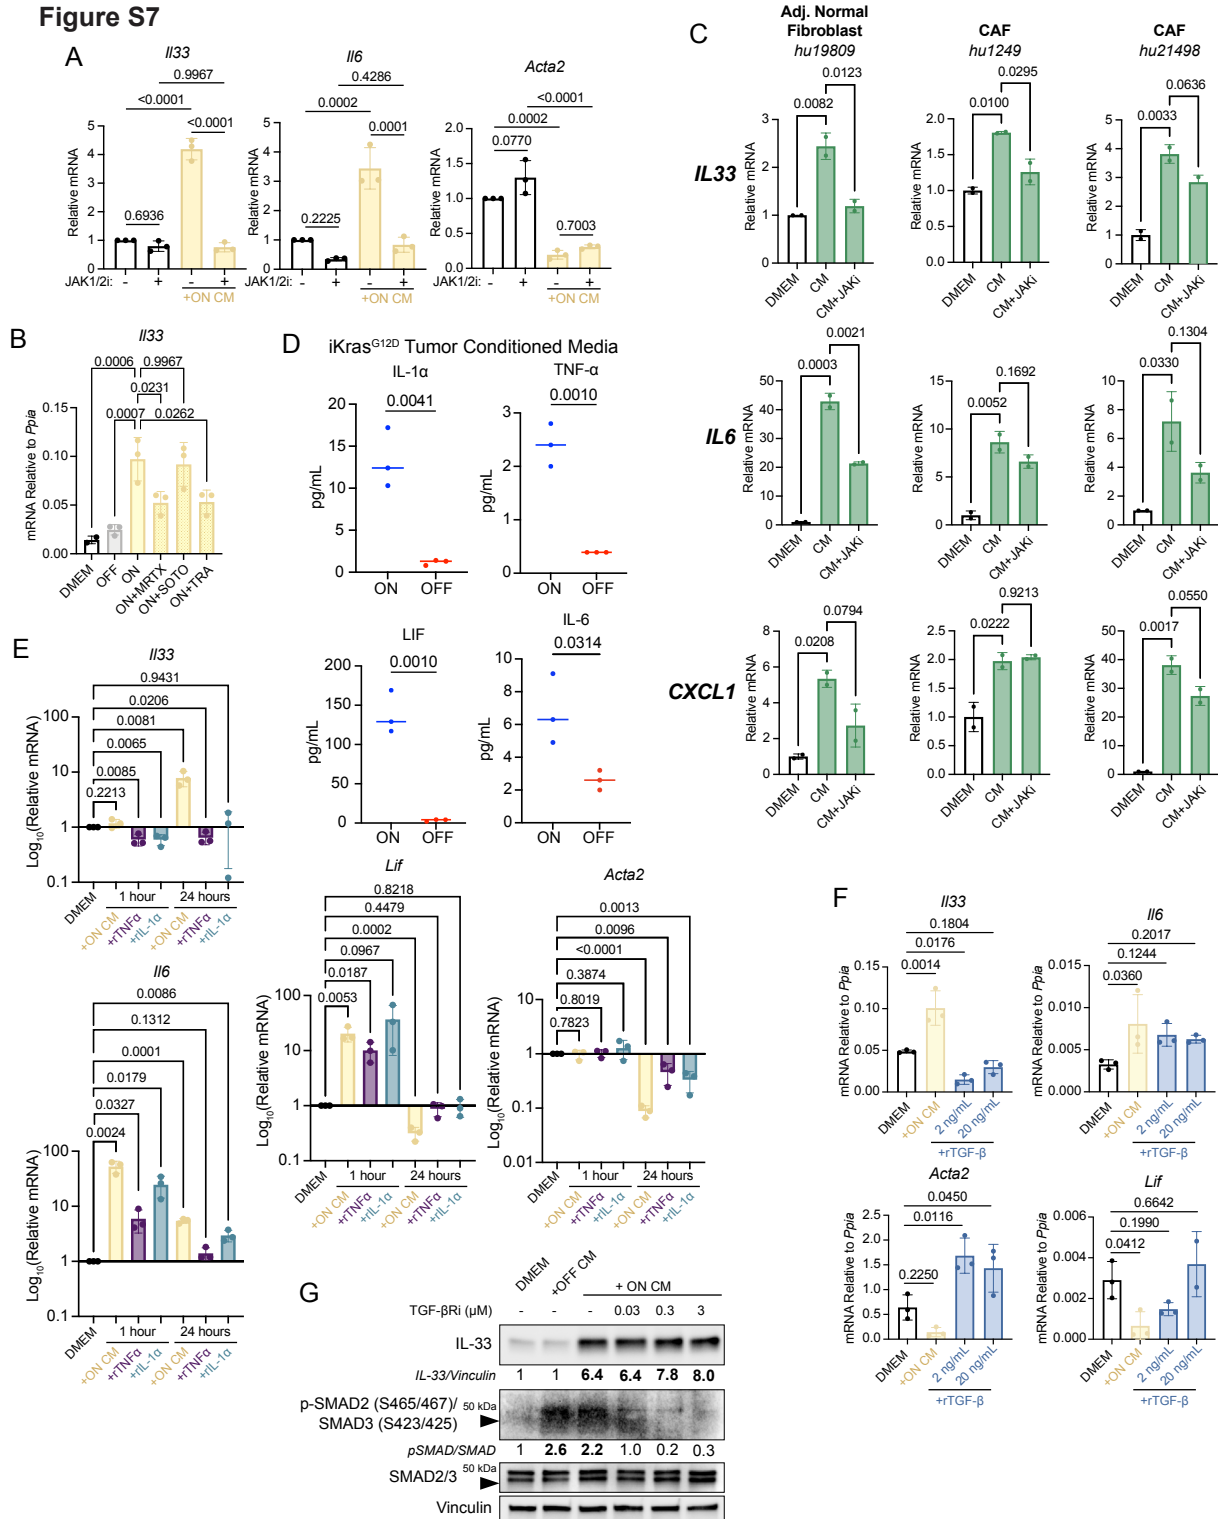

**Figure S7: Tumor cell-initiated autocrine signaling drives IL-33 upregulation in pancreatic fibroblasts.** (A) qRT-PCR of CD1WT after 24h of treatment with DMEM, JAK1/2i, iKras<sup>G12D</sup> “ON” CM, or concurrent iKras<sup>G12D</sup> “ON” CM and JAK1/2i (0.3 μM/mL). Values are relative to DMEM group. Groups were compared with ordinary one-way ANOVA. (B) qRT-PCR of CD1WT after 24h of treatment with DMEM, iKras<sup>G12D</sup> “OFF” CM, iKras<sup>G12D</sup> “ON” CM, or concurrent iKras<sup>G12D</sup> “ON” CM and the KRAS<sup>G12D</sup>i MRTX1133 (0.5 μM/mL), the KRAS<sup>G12C</sup>i Sotorasib (0.5 μM/mL), or the MEK1/2i Trametinib (50 nM/mL). Values are relative to DMEM group. Ordinary one-way ANOVA was performed to compare each condition to iKras<sup>G12D</sup> “ON” CM group. (C) qRT-PCR of primary human pancreatic fibroblasts after 24h of treatment with DMEM, PDA organoid CM, or concurrent PDA organoid CM and JAK1/2i (0.5 μM/mL). Values are relative to DMEM group. Groups were compared with ordinary one-way ANOVA. (D) Concentration of cytokines in iKras<sup>G12D</sup> “ON” CM and iKras<sup>G12D</sup> “OFF” CM as measured by ELISA. Two-tailed Student’s *t* test was performed to compare groups. IL-1β was probed for but not detected in our samples. (E) qRT-PCR of CD1WT after treatment with DMEM, iKras<sup>G12D</sup> “ON” CM, rTNF-α (20 ng/mL), or rIL-1α (20 ng/mL) for 1h or 24h. Values are relative to DMEM group and Log<sub>10</sub> transformed to better visualize the large changes in gene expression level. Ordinary one-way ANOVA was performed to compare each condition to DMEM group. (F) qRT-PCR of CD1WT after treatment with DMEM, iKras<sup>G12D</sup> “ON” CM, rTGF-β (2 ng/mL or 20 ng/mL) for 24h. Values are relative to DMEM group. Ordinary one-way ANOVA was performed to compare each condition to DMEM group. (G) Western blot of CD1WT whole cell lysates treated with DMEM, iKras<sup>G12D</sup> “OFF” CM, iKras<sup>G12D</sup> “ON” CM, or concurrent iKras<sup>G12D</sup> “ON” CM and TGF-βRi. In all experiments with iKras<sup>G12D</sup> CM, doxycycline is used as a vehicle control. In all experiments with JAK1/2i (Ruxolitinib) or TGF-βRi (Galunisertib), DMSO was used as a vehicle control. qRT-PCR values are normalized to *Ppia* (Cyclophilin A) in murine experiments and *GAPDH* in human experiments. All replicates represent complete, independent experiments.
